# Supplementary material for: Low Expression of miR-375 and miR-190b Differentiates Grade 3 Patients with Endometrial Cancer
Source: MDPI journal article supplement (doi:10.3390/biom11020274), 2021-02-13
Supplement: s1 [file s1]

**Supplementary Table 1.** Patients characteristic.

| No. | Patients phenotype |             |             |             |                         |                                    |             |       | Tumour phenotype |                                                  |                                  | Stage (FIGO) |
|-----|--------------------|-------------|-------------|-------------|-------------------------|------------------------------------|-------------|-------|------------------|--------------------------------------------------|----------------------------------|--------------|
|     | Patient ID         | Age (years) | Height (cm) | Weight (kg) | Number of menstruations | Time to last menstruation (months) | Pregnancies | BMI   | Tumour grade     | Histological type according to WHO               | Dualistic Bokhman classification |              |
| 1   | 1                  | 57          | 167         | 80          | 410                     | 57                                 | 4           | 28,69 | 1                | Endometroid carcinoma                            | 1                                | IA           |
| 2   | 2                  | 67          | 162         | 63          | 430                     | 57                                 | 2           | 24,01 | 1                | Endometroid carcinoma                            | 1                                | IA           |
| 3   | 13                 | 66          | 150         | 90          | 360                     | 50                                 | 2           | 40,00 | 1                | Endometroid carcinoma                            | 1                                | IB           |
| 4   | 16                 | 54          | 154         | 97          | 350                     | 47                                 | 0           | 40,90 | 1                | Endometroid carcinoma                            | 1                                | IA           |
| 5   | 20                 | 76          | 162         | 75          | 370                     | 51                                 | 2           | 28,58 | 1                | Endometroid carcinoma                            | 1                                | IA           |
| 6   | 24                 | 56          | 167         | 65          | 380                     | 52                                 | 2           | 23,31 | 1                | Endometroid carcinoma                            | 1                                | IA           |
| 7   | 25                 | 66          | 162         | 80          | 410                     | 55                                 | 2           | 30,48 | 1                | Endometroid carcinoma                            | 1                                | IA           |
| 8   | 27                 | 78          | 165         | 80          | 380                     | 52                                 | 2           | 29,38 | 1                | Endometroid carcinoma                            | 1                                | IA           |
| 9   | 30                 | 64          | 164         | 100         | 340                     | 48                                 | 2           | 37,18 | 1                | Endometroid carcinoma                            | 1                                | IA           |
| 10  | 34                 | 67          | 170         | 80          | 340                     | 48                                 | 2           | 27,68 | 1                | Endometroid carcinoma                            | 1                                | IB           |
| 11  | 7                  | 54          | 167         | 70          | 350                     | 49                                 | 2           | 25,10 | 2                | Endometroid carcinoma                            | 1                                | IA           |
| 12  | 8                  | 64          | 162         | 94          | 410                     | 54                                 | 1           | 35,82 | 2                | Endometroid carcinoma                            | 1                                | IB           |
| 13  | 18                 | 53          | 160         | 53          | 380                     | 52                                 | 2           | 20,70 | 2                | Endometroid carcinoma                            | 1                                | IB           |
| 14  | 23                 | 65          | 158         | 70          | 380                     | 53                                 | 3           | 28,04 | 2                | Endometroid carcinoma                            | 1                                | IB           |
| 15  | 32                 | 61          | 165         | 92          | 380                     | 52                                 | 2           | 33,79 | 2                | Endometroid carcinoma                            | 1                                | IA           |
| 16  | 40                 | 54          | 164         | 108         | 370                     | 53                                 | 4           | 40,15 | 2                | Endometroid carcinoma                            | 1                                | IB           |
| 17  | 44                 | 54          | 170         | 74          | 380                     | 53                                 | 3           | 25,61 | 2                | Endometroid carcinoma                            | 1                                | IB           |
| 18  | 6                  | 56          | 165         | 56          | 400                     | 54                                 | 2           | 20,57 | 3                | Endometroid carcinoma                            | 2                                | IB           |
| 19  | 10                 | 78          | 158         | 73          | 290                     | 44                                 | 3           | 29,24 | 3                | Clear cell adenocarcinoma                        | 2                                | II           |
| 20  | 26                 | 64          | 168         | 98          | 350                     | 50                                 | 3           | 34,72 | 3                | Undifferentiated carcinoma                       | 2                                | IA           |
| 21  | 38                 | 67          | 156         | 93          | 400                     | 53                                 | 1           | 38,21 | 3                | Endometroid carcinoma                            | 2                                | II           |
| 22  | 39                 | 77          | 165         | 67          | 320                     | 45                                 | 1           | 24,61 | 3                | Endometroid carcinoma                            | 2                                | IA           |
| 23  | 45                 | 46          | 158         | 52          | 310                     | 46                                 | 3           | 20,83 | 3                | Endometroid carcinoma                            | 2                                | IA           |
| 24  | 46                 | 58          | 165         | 66          | 430                     | 57                                 | 2           | 24,24 | 3                | Endometroid carcinoma/Undifferentiated carcinoma | 2                                | IIIA         |
